# Supplementary material for: Analysis of Schistosoma mansoni genes shared with Deuterostomia and with possible roles in host interactions
Source: PubMed Central journal article supplement (PMC2194728; doi:10.1186/1471-2164-8-407), 2007-11-08

### Additional file 3: Conserved domains in SmIRF.

**A:** BLAST analysis against the SWISSPROT database. A conserved N-terminal DNA-binding domain in SmIRF can be easily detected. **B:** *In silico* analysis of SmIRF using NetPhos revealed the presence of several Serine phosphorylation sites, important for IRF function and regulation.

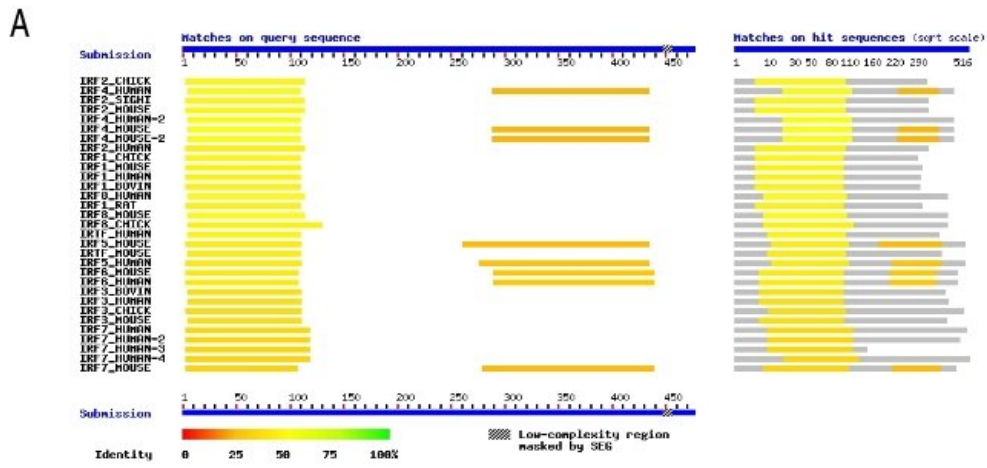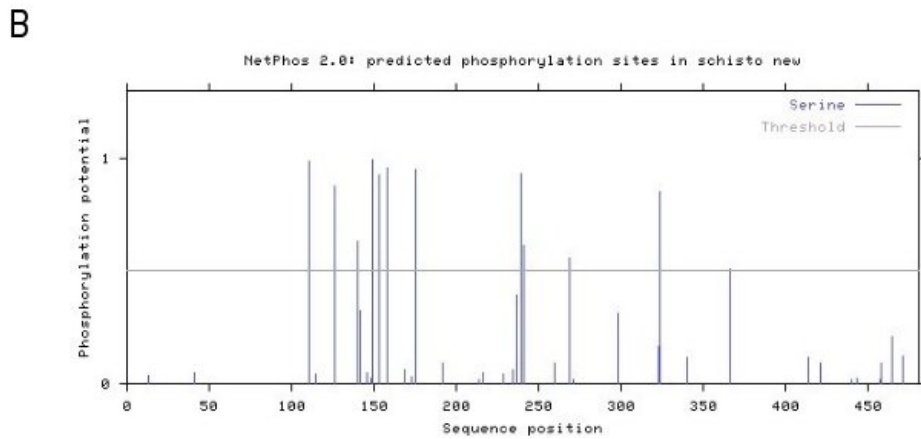

Supplement: 1471-2164-8-407-S3.pdf [file 1471-2164-8-407-S3.pdf]
