# Supplementary material for: Analysis of Schistosoma mansoni genes shared with Deuterostomia and with possible roles in host interactions
Source: PubMed Central journal article supplement (PMC2194728; doi:10.1186/1471-2164-8-407), 2007-11-08
Supplement: 1471-2164-8-407-S4.pdf [file 1471-2164-8-407-S4.pdf]

**Additional file 4: Primers used in this study**

| <b>Name</b>                  | <b>Primer sequence</b>         |
|------------------------------|--------------------------------|
| 3'-RACE GSP 1                | ATTAGTAAAGATAGACTTGGAAAGTTAAGC |
| 3'-RACE GSP 2                | ATCTATTATTAGACTTGGGGAGCTTG     |
| Vasohibin FW (real-time PCR) | AGCATATCATGGTCATTATCAC         |
| Vasohibin RV (real-time PCR) | CAACATGTAAGGTCGATGTG           |
| Tubulin FW                   | CCATTTATGATATTTGTCGACGGA       |
| Tubulin RV                   | TTTGTGTAGGTTGGACGCTCTATATCTA   |
| INSIG FW                     | CAGGACAATGACGACACCACC          |
| INSIG RV                     | GCTGCTTGGTTGCCTTGTCT           |
